# Supplementary material
Source: Research Square preprint supplement (doi:10.21203/rs.3.rs-10072673/v1)
Supplement: Supplementary file 1 [file 4412b3aa3066361c1687b1c1.docx]

Table 3. Thematic Analysis of Serbian Nurses' Knowledge Regarding the Early Diagnosis and Screening of Colorectal Cancer

| **Themes** | **Sub Themes** | **Codes** |
| --- | --- | --- |
| **1.** Colorectal Cancer Early Symptoms and Awareness | 1. Gastrointestinal Symptoms 2. Systemic Symptoms 3. Symptom Awareness and Interpretation 4. Awareness Influence 5. Knowledge Gaps and Barriers | A1. Lack of Regular Eating Hours  A2..Pre-shift Preparation  A3. Meal Routine Disruption  B1. Fatigue / Weakness  B2. Loss of appetite  B3. Weight loss  B4. Anemia  B5. Night sweats  C1. Ignoring or normalizing symptoms  C2. Fear reaction when seeing blood in stool  C3. Perceiving symptoms as not always cancer-related  D1. Media effect and public discussions  D2. Increasing awareness over time  D3. Perception of growing incidence across age groups  E1. Lack of sufficient knowledge  E2. Low awareness despite information availability  E3. Screening refusal  E4. Tendency to ignore preventive measures |
| **2.** The Nurse's Holistic Care Role | A. Communication and Psychological Support  B. Collaboration with the Doctor  C. Education and Information  D. Organisation and Follow-up  E. Issues Related to the Angel  F. Genetics  G. Nutrition | A1. Reducing patients' fears A 2. Inspiring confidence A 3. Sedation A 4. Explaining the process  B1. Participation in screening decisions with the doctor  B2. Colonoscopy planning process  C3. Teaching how to conduct the test  C1. Teaching how to conduct the test  C2. Need for continuous training  D1. Calling the target age group  D2. Scheduling appointments  D3. Tracking and recording test results  E1. Staff shortages  E2. Administrative burden  E3. Sedation not being preferred in state hospitals  E4. Preference for private hospitals  F1. Family history, genetic predisposition  G1. Unhealthy diet  G2. High meat consumption  G3. Consumption of spicy foods  G4. Alcohol and tobacco use  G5. Insufficient exercise |
| **3** Colorectal Cancer: Risk Factors, Screening Process and the Role of Nurses | A. Information and Education Role  B. Monitoring and Administrative Role  C. Communication and Initial Contact | A1. Explain the purpose of the scan to the patient.  A2. Provide information to prevent confusion with colonoscopy.  A.3. Eliminate misunderstandings and confusion.  B1. Database records  B2. Entering results into the system and informing the doctor  B3. Referring the patient for further diagnosis and consultation  C1. Conducting the initial consultation with patients |
| **4.** Risk Groups category | A. High risk  B. Medium risk  C.Low risk | A1. Those with a family history of colorectal cancerA2. Genetic syndromes A3. History of polyps, Crohn's disease or ulcerative colitis A4. Chronic diseases (obesity, hypertension, etc.) A5. Noticeable symptoms or blood in the stool  B1. Certain hereditary risk factors (modifiable) B2. Lack of physical activity, poor nutrition, smoking/alcohol consumption  B3. Short-term changes in bowel movements B4. Do not neglect stress and health  C2. People who eat healthily and have an active lifestyle C3. Individuals with no family history of cancer and who are asymptomatic |
| **5.** Educational Experiences and Development Needs | A. Educational Resources and Methods  B. Shortcomings and Requirements in Education  C. Digital and Individual Learning | A1. Formal education  A2. Informal learning  A3. Digital learning  B1. Need for updating  B2. Expectations of competence and expertise  C1. Test-monitored sessions  C2. Periodic training tailored to the type of cancer  C3. Workshops and interactive training  C4. Content tailored to specific cancers |
| 6. Limitations of the screening process | A. Increased workload with multitasking  B Insufficient scanning | A1. Performing multiple tasks simultaneously  A2. Increasing number of patients  B1. Time limit allocated for screening time  B2. Insufficient staff |
