# Supplementary material
Source: Research Square preprint supplement (doi:10.21203/rs.3.rs-10072673/v1)
Supplement: Supplementary file 2 [file ba139a93518ad3cf59623370.docx]

Table 1. Consolidated criteria for reporting qualitative research (COREQ). Area 1: Research team and reflexivity

Personal Characteristics

| **No.** | **Item** | **Guiding questions** | **Explanations** |
| --- | --- | --- | --- |
| **1** | Interviewer/ facilitator | Which author/authors conducted the interview or  focus group? | Two author conducted the interview**.**  Turkish interview conducted first author  Serbian interview conductred second author |
| **2** | Credentials | What were the researcher's credentials? | First author PhD Second author PhD |
| **3** | Profession | What was their occupation at the time of the study? | First author Dr Surgical Nursing  Second author Dr Medical Phisicians |
| **4** | Gender | Was the investigator a man or a woman? | First author Female  Second author Female |
| **5** | Experience and training | What experience or training did the researcher have? | The first author has taken courses on qualitative research and has experience in qualitative research  Second author: has taken courses on qualitative research and has experience in qualitative research |

Relationship with participants

| 6 | Relationship status | Was a relationship established  before the training started? | No relationship was established before the start of the study. |
| --- | --- | --- | --- |
| 7 | Interviewer's participant  information | What did the participants know  about the researcher? | The individuals knew that the researcher had a doctorate in the field of  surgical diseases nursing and the medical doctor. At the beginning of each interview, the participants were informed about the purpose and objectives of the study. |
| 8 | Interviewer characteristics | What characteristics were  reported about the interviewer/facilitator? | Information about interviewer occupation and affiliation. |

Area 2. Study Design

| 9 | Methodological orientation and theory | Which methodological orientation  was specified to support the study,  e.g. discourse analysis, ethnography, phenomenology, content analysis? | This study is a qualitative study  based on volunteerism. |
| --- | --- | --- | --- |

Participant selection

| 10 | Sampling | How were the participants selected? | This is a qualitative study. |
| --- | --- | --- | --- |

|  |  |  | The qualitative section was completed with a total of 26 nurses. |
| --- | --- | --- | --- |
| 11 | Approach method | How were the participants approached? | The timing of the interviews was determined by the individuals who voluntarily agreed to participate in  the study. |
| 12 | Sample size | How many participants were there  in the study? | A total 26 individuals were included in the study. |
| 13 | Non-participation | How many people refused to participate or dropped out? Reasons? | No participants refused to participate in the study. |

Setting

| 14 | The setting of data collection | Where was the data collected? | Detailed information is given in the data collection  section of the research. |
| --- | --- | --- | --- |
| 15 | Presence of non-participants | Was anyone else present apart from  the participants and the researchers? | There were no observers. |
| 16 | Description of the sample | What are the important  characteristics of the sample? | Individuals who agreed to participate in the study  were included in the study. They are all female nurses. |

Data collection

| 17 | Interview guide | Were questions, prompts and guidelines provided by the authors?  Has it been pilot tested? | Detailed information is given in the Methods section. |
| --- | --- | --- | --- |
| 18 | Repeat interviews | Have there been re-interviews? If  yes, how many? | No. |
| 19 | Audio/visual recording | Was audio recording or visual recording used to collect data in the  research? | Interviews were conducted voice record face to face and transcribed on paper. |
| 20 | Field notes | Were field notes taken during and/or  after the interview or focus group? | The responses of all individuals and the researcher's  observations were recorded. |
| 21 | Duration | How long were the interviews or  focus groups? | Each interview lasted between 30-35 minutes. |
| 22 | Data saturation | Has data saturation been discussed? | Data saturation is discussed. |
| 23 | Transcripts returned | Have transcripts been returned to participants for comments and/or  corrections? | No. |
