# Supplementary material
Source: Research Square preprint supplement (doi:10.21203/rs.3.rs-10072673/v1)
Supplement: Supplementary file 3 [file de7c36e368236c203863e212.docx]

Table 4. Thematic Analysis of Turkish Nurses' Knowledge Regarding the Early Diagnosis and Screening of Colorectal Cancer

| **Themes** | **Sub Themes** | **Codes** |
| --- | --- | --- |
| **1.** Colorectal Cancer Early Symptoms and Awareness | A. Gastrointestinal Symptoms  B. Systemic Symptoms  C. Symptom Awareness and Interpretation  D. Risk Perception | A1. Changes in bowel habits  A2. Prolonged constipation; prolonged diarrhoea; A3. Change in stool colour  A4. Mucus-containing/watery stool; persistent gas problem; abdominal pain  B1. Undiagnosed anaemia B2. Lethargy B3. Fatigue B4. Loss of appetite B5. Weight loss  C1. Underestimating the symptoms C2. Attribution to stress C3. Being tied to one's lifestyle  C4. Low awareness in society  D1. The perception of familial factors as a risk D2. The perception of genetic factors as a risk factor |
| **2.** Faecal Occult Blood Test: Implementation, Training and Awareness | A. GGK implementation process  B. Training process  C. Community awareness | A1. Age group  A2. Test description  A3. Dietary restriction  A4. Positive process - test repetition  B1. Healthcare worker training  B2. Patient education  C1. Patient's level of consciousness  C2. Screening sensitivity  C3. Nurse's role  C4. Providing accurate information |
| **3.** The Educational and Guiding Role of Nurses in Cancer Screening | A. Patient Awareness and Health Literacy  B. Screening, Referral and Referral Process  C. Institutional and Digital Risk Control Mechanisms  D. Community-Based Dissemination and Process Management | A1. Addressing lack of information, fear and prejudice  A2. Teaching the necessity of screening and the timing of application  A3. The nurse's educational and advisory role  B1 Referral for colonoscopy and other diagnostic tests  B2 Cancer screening centres and primary care integration  B3 Identification of high-risk individuals and referral to gastroenterology  C1 Electronic alert systems  C2. Detection of missed scans  C3 Family doctor–nurse collaboration  D1. Public awareness through brochures  D2. Referral to family doctor  D3. Monitoring and recording screening results in the system |
| 4. Risk Groups in Colorectal Cancer Screening | A. High risk  B. Medium risk  C.Low risk | A1 Genetic predisposition  A2 Family history of colorectal cancer  A3 Smoking  A4 Blood in stool  A5 Previous history of colorectal disease  B1. Irregular bowel habits B2. Constipation, diarrhoea  C. People who eat healthily and have an active lifestyle |
| 5. Nurses' Educational Level, Knowledge Adequacy and Perception of Their Role in Practice | A. Depth of Knowledge According to Educational Level  B. Perception of Professional Knowledge Competence  C. Continuous Learning and Personal Development  D. Educational Materials and Standard Information Sources | A1. The clear difference between secondary school and undergraduate education  A2. The more comprehensive nature of undergraduate education  A3. The impact of academic education on professional development  B1. Superficial training  B2. Presentation of information in general terms B3. Lack of in-depth clinical knowledge  C1. Acquiring knowledge through personal effort  C2. Self-improvement through reading and research  C3. Gathering information from different sources  D1. Training based on brochures and documents  D2. Use of ready-made presentations and internet resources D3. Training using standardised content |
| 6. Nursing Competence and Screening Process | A. Activity, Role and Limitations  B. Conditions of Application | A1. Need for corporate authorisation and job description  A2. Level of education and knowledge adequacy  A3. Professional self-confidence  A4. The nursing role being limited to providing information and guidance  A5. Diagnostic procedures being the responsibility of the physician  B1. Time constraints  B2. Heavy workload  B3. Need to convey a lot of information in a short time  B4. Need for additional staff |
