# Supplementary material
Source: Research Square preprint supplement (doi:10.21203/rs.3.rs-10072673/v1)
Supplement: Supplementary file 4 [file fac9015d71e806f3e04e2f3a.docx]

# Table 2. Characteristics of Participants Serbian and Turkish Nurses

| **Participant** | **SRBN**  **Age** | **Years of professional experience of SRBN** | **Previous history of colorectal cancer education of SRBN** | **Gender** |
| --- | --- | --- | --- | --- |
| P1 | 43 | 16 | Yes | Female |
| P2 | 59 | 30 | No | Female |
| P3 | 44 | 22 | No | Female |
| P4 | 39 | 15 | Yes | Female |
| P5 | 30 | 8 | No | Female |
| P6 | 59 | 32 | Yes | Female |
| P7 | 48 | 24 | No | Female |
| P8 | 42 | 22 | No | Female |
| P9 | 42 | 18 | No | Female |
| P10 | 58 | 38 | Yes | Female |
| P11 | 42 | 18 | No | Female |
| P12 | 22 | 2 | No | Female |
| P13 | 41 | 23 | No | Female |
|  | **TKN Age** | **Years of professional experience of TKN** | **Previous history of colorectal cancer education of TKN** |  |
| P14 | 38 | 10 | No | Female |
| P15 | 52 | 22 | No | Female |
| P16 | 55 | 23 | No | Female |
| P17 | 52 | 20 | No | Female |
| P18 | 36 | 10 | No | Female |
| P19 | 32 | 5 | Yes | Female |
| P20 | 36 | 6 | No | Female |
| P21 | 46 | 11 | Yes | Female |
| P22 | 48 | 22 | No | Female |
| P23 | 44 | 20 | Yes | Female |
| P24 | 36 | 10 | Yes | Female |
| P25 | 32 | 5 | No | Female |
| P26 | 53 | 7 | No | Female |

**TKN: Turkish Nurses, SRBN: Serbian Nurses**
